# Supplementary material for: Seasonal changes in objectively measured sedentary behavior and physical activity in Japanese primary school children
Source: PubMed Central journal article supplement (PMC5020446; doi:10.1186/s12889-016-3633-5), 2016-09-13
Supplement: 12889_2016_3633_MOESM2_ESM.pdf [file 12889_2016_3633_MOESM2_ESM.pdf]

Additional file Table 1b Associations between changes in sedentary behavior or physical activity and potential determinants/moderators in girls

| Dependent variables           | Are you active? | Girls: 1: n=10, 2: n=42, 3: n=57 |       |                                             |                               | Are you good at sports or exercise?         | Girls: 1: n=23, 2: n=34, 3: n=54           |       |                                             |                               | Is your child good at sports or exercise?   | Girls: 1: n=39, 2: n=40, 3: n=30           |                                            |                               |                               | How would you describe your child's body shape? | Girls: 1: n=31, 2: n=66, 3: n=12 |                |         |         |       |       |
|-------------------------------|-----------------|----------------------------------|-------|---------------------------------------------|-------------------------------|---------------------------------------------|--------------------------------------------|-------|---------------------------------------------|-------------------------------|---------------------------------------------|--------------------------------------------|--------------------------------------------|-------------------------------|-------------------------------|-------------------------------------------------|----------------------------------|----------------|---------|---------|-------|-------|
|                               |                 | Estimated                        |       | B                                           | P-value                       |                                             | Estimated                                  |       | B                                           | P-value                       |                                             | Estimated                                  |                                            | B                             | P-value                       |                                                 | Estimated                        |                | B       | P-value |       |       |
|                               |                 | mean                             | SE    |                                             |                               |                                             | mean                                       | SE    |                                             |                               |                                             | mean                                       | SE                                         |                               |                               |                                                 | mean                             | SE             |         |         |       |       |
| ASedentary behavior (min/day) | 1. no           | 9.4                              | 17.3  | -15.0                                       | 0.021 (2 VS 3)                | 1. considerably and slightly lower skilled  | 22.4                                       | 11.4  | 7.4                                         | 0.021 (2 VS 3)                | 1. considerably and slightly lower skilled  | 19.0                                       | 8.9                                        | 12.4                          | 0.021 (2 VS 3)                | 1. thin                                         | 17.1                             | 11.2           | 35.8    |         |       |       |
|                               | 2. neither      | -0.1                             | 8.1   | -24.6                                       |                               | 2. slightly highly skilled                  | 4.8                                        | 9.4   | -10.2                                       |                               | 2. slightly highly skilled                  | 13.8                                       | 8.3                                        | 7.2                           |                               | 2. maintain the present body                    | 17.8                             | 6.8            | 36.5    |         |       |       |
|                               | 3. yes          | 24.5                             | 7.5   | 0.0                                         |                               | 3. considerably highly skill                | 15.0                                       | 7.8   | 0.0                                         |                               | 3. considerably highly skill                | 6.6                                        | 9.6                                        | 0.0                           |                               | 3. overweight or obese                          | -18.7                            | 20.7           | 0.0     |         |       |       |
|                               | *1. no          | 9.0                              | 17.5  | -15.9                                       |                               | *1. considerably and slightly lower skilled | 22.4                                       | 11.4  | 7.4                                         |                               | *1. considerably and slightly lower skilled | 19.1                                       | 8.9                                        | 13.5                          |                               | *1. thin                                        | 17.2                             | 11.2           | 36.3    |         |       |       |
| *2. neither                   | 0.0             | 8.1                              | -24.8 | 0.021 (2 VS 3)                              | *2. slightly highly skilled   | 4.8                                         | 9.5                                        | -10.1 | 0.021 (2 VS 3)                              | *2. slightly highly skilled   | 13.7                                        | 8.4                                        | 8.2                                        | *2. maintain the present body | 17.5                          | 6.9                                             | 36.6                             |                |         |         |       |       |
| *3. yes                       | 24.8            | 7.6                              | 0.0   |                                             | *3. considerably highly skill | 15.0                                        | 8.0                                        | 0.0   |                                             | *3. considerably highly skill | 5.5                                         | 9.9                                        | 0.0                                        | *3. overweight or obese       | -19.1                         | 20.8                                            | 0.0                              |                |         |         |       |       |
| ALPA (min/day)                |                 |                                  |       |                                             |                               |                                             |                                            |       |                                             |                               |                                             |                                            |                                            |                               |                               |                                                 |                                  |                |         |         |       |       |
| Ambulatory                    | 1. no           | -12.3                            | 5.9   |                                             | 3.7                           | 0.021 (2 VS 3)                              | 1. considerably and slightly lower skilled | -19.2 |                                             | 3.8                           | -5.7                                        | 0.021 (2 VS 3)                             | 1. considerably and slightly lower skilled | -18.6                         | 2.9                           | -7.9                                            | 0.021 (2 VS 3)                   | 1. thin        | -15.4   | 3.8     | -3.0  |       |
| 2. neither                    | -13.9           | 2.8                              | 2.1   | 2. slightly highly skilled                  | -13.4                         |                                             | 3.2                                        | 0.1   | 2. slightly highly skilled                  | -14.0                         | 2.7                                         |                                            | -3.3                                       | 2. maintain the present body  | -14.3                         | 2.3                                             |                                  | -2.0           |         |         |       |       |
| 3. yes                        | -16.0           | 2.5                              | 0.0   | 3. considerably highly skill                | -13.5                         |                                             | 2.6                                        | 0.0   | 3. considerably highly skill                | -10.8                         | 3.1                                         |                                            | 0.0                                        | 3. overweight or obese        | -12.4                         | 7.2                                             |                                  | 0.0            |         |         |       |       |
| *1. no                        | -12.2           | 5.9                              | 3.7   | *1. considerably and slightly lower skilled | -19.2                         |                                             | 3.8                                        | -5.7  | *1. considerably and slightly lower skilled | -18.9                         | 3.0                                         |                                            | -8.3                                       | *1. thin                      | -15.4                         | 3.8                                             |                                  | -3.0           |         |         |       |       |
| *2. neither                   | -13.9           | 2.8                              | 2.1   | 0.021 (2 VS 3)                              | *2. slightly highly skilled   | -13.4                                       | 3.2                                        | 0.1   | 0.021 (2 VS 3)                              | *2. slightly highly skilled   | -14.0                                       | 2.8                                        | -3.3                                       | 0.021 (2 VS 3)                | *2. maintain the present body | -14.3                                           | 2.3                              | -2.0           |         |         |       |       |
| *3. yes                       | -16.0           | 2.6                              | 0.0   |                                             | *3. considerably highly skill | -13.5                                       | 2.6                                        | 0.0   |                                             | *3. considerably highly skill | -10.6                                       | 3.2                                        | 0.0                                        |                               | *3. overweight or obese       | -12.4                                           | 7.3                              | 0.0            |         |         |       |       |
| Non-ambulatory                | 1. no           | -37.5                            | 10.7  |                                             | -10.3                         | 0.021 (2 VS 3)                              | 1. considerably and slightly lower skilled | -30.6 |                                             | 7.0                           | -2.5                                        | 0.021 (2 VS 3)                             | 1. considerably and slightly lower skilled |                               | -33.9                         | 5.6                                             | -4.1                             | 0.021 (2 VS 3) | 1. thin | -30.8   | 7.2   | -11.6 |
| 2. neither                    | -24.4           | 5.0                              | 2.8   |                                             | 2. slightly highly skilled    |                                             | -25.1                                      | 5.8   |                                             | 2.9                           | 2. slightly highly skilled                  |                                            | -21.0                                      |                               | 5.2                           | 8.8                                             | 2. maintain the present body     |                | -27.7   | 4.3     | -8.5  |       |
| 3. yes                        | -27.2           | 4.6                              | 0.0   | 3. considerably highly skill                | -28.1                         |                                             | 4.8                                        | 0.0   | 3. considerably highly skill                | -29.8                         | 5.9                                         |                                            | 0.0                                        | 3. overweight or obese        | -19.2                         | 13.4                                            | 0.0                              |                |         |         |       |       |
| *1. no                        | -38.4           | 10.9                             | -11.8 | *1. considerably and slightly lower skilled | -30.9                         |                                             | 7.0                                        | -3.2  | *1. considerably and slightly lower skilled | -34.0                         | 5.6                                         |                                            | -4.7                                       | *1. thin                      | -31.0                         | 7.2                                             | -12.7                            |                |         |         |       |       |
| *2. neither                   | -24.5           | 5.0                              | 2.1   | 0.021 (2 VS 3)                              | *2. slightly highly skilled   | -24.9                                       | 5.8                                        | 2.8   | 0.021 (2 VS 3)                              | *2. slightly highly skilled   | -20.8                                       | 5.2                                        | 8.5                                        | 0.021 (2 VS 3)                | *2. maintain the present body | -27.4                                           | 4.4                              | -9.1           |         |         |       |       |
| *3. yes                       | -26.6           | 4.8                              | 0.0   |                                             | *3. considerably highly skill | -27.7                                       | 4.9                                        | 0.0   |                                             | *3. considerably highly skill | -29.3                                       | 6.0                                        | 0.0                                        |                               | *3. overweight or obese       | -18.3                                           | 13.5                             | 0.0            |         |         |       |       |
| Total                         | 1. no           | -50.4                            | 13.5  |                                             | -7.4                          | 0.021 (2 VS 3)                              | 1. considerably and slightly lower skilled | -49.8 |                                             | 8.8                           | -8.2                                        | 0.021 (2 VS 3)                             | 1. considerably and slightly lower skilled |                               | -52.3                         | 6.9                                             | -11.9                            | 0.021 (2 VS 3) | 1. thin | -46.3   | 9.0   | -14.8 |
| 2. neither                    | -37.9           | 6.3                              | 5.0   |                                             | 2. slightly highly skilled    |                                             | -38.0                                      | 7.3   |                                             | 3.6                           | 2. slightly highly skilled                  |                                            | -34.9                                      |                               | 6.5                           | 5.4                                             | 2. maintain the present body     |                | -41.8   | 5.4     | -10.3 |       |
| 3. yes                        | -43.0           | 5.8                              | 0.0   | 3. considerably highly skill                | -41.6                         |                                             | 6.1                                        | 0.0   | 3. considerably highly skill                | -40.4                         | 7.5                                         |                                            | 0.0                                        | 3. overweight or obese        | -31.4                         | 16.5                                            | 0.0                              |                |         |         |       |       |
| *1. no                        | -50.4           | 13.6                             | -7.5  | *1. considerably and slightly lower skilled | -50.0                         |                                             | 8.9                                        | -8.5  | *1. considerably and slightly lower skilled | -52.9                         | 7.0                                         |                                            | -13.2                                      | *1. thin                      | -46.3                         | 9.0                                             | -14.9                            |                |         |         |       |       |
| *2. neither                   | -38.0           | 6.4                              | 5.0   | 0.021 (2 VS 3)                              | *2. slightly highly skilled   | -38.1                                       | 7.3                                        | 3.4   | 0.021 (2 VS 3)                              | *2. slightly highly skilled   | -34.6                                       | 6.6                                        | 5.0                                        | 0.021 (2 VS 3)                | *2. maintain the present body | -41.6                                           | 5.5                              | -10.2          |         |         |       |       |
| *3. yes                       | -43.0           | 6.0                              | 0.0   |                                             | *3. considerably highly skill | -41.5                                       | 6.2                                        | 0.0   |                                             | *3. considerably highly skill | -39.6                                       | 7.6                                        | 0.0                                        |                               | *3. overweight or obese       | -31.4                                           | 16.6                             | 0.0            |         |         |       |       |
| AMVPA (min/day)               |                 |                                  |       |                                             |                               |                                             |                                            |       |                                             |                               |                                             |                                            |                                            |                               |                               |                                                 |                                  |                |         |         |       |       |
| Ambulatory                    | 1. no           | -6.9                             | 2.9   |                                             | 0.5                           | 0.032 (1 VS 2)                              | 1. considerably and slightly lower skilled | -10.5 |                                             | 1.8                           | -4.5                                        | 0.032 (1 VS 2)                             | 1. considerably and slightly lower skilled |                               | -6.9                          | 1.3                                             | -1.9                             | 0.032 (1 VS 2) | 1. thin | -8.2    | 1.6   | -6.8  |
| 2. neither                    | -6.4            | 1.3                              | 1.1   | 2. slightly highly skilled                  | -5.7                          |                                             | 1.5                                        | 0.4   | 2. slightly highly skilled                  | -8.2                          | 1.2                                         |                                            | -3.2                                       | 2. maintain the present body  | -7.3                          | 1.0                                             | -5.9                             |                |         |         |       |       |
| 3. yes                        | -7.4            | 1.2                              | 0.0   | 3. considerably highly skill                | -6.1                          |                                             | 1.2                                        | 0.0   | 3. considerably highly skill                | -5.0                          | 1.4                                         |                                            | 0.0                                        | 3. overweight or obese        | -1.4                          | 3.0                                             | 0.0                              |                |         |         |       |       |
| *1. no                        | -6.4            | 2.9                              | 1.0   | *1. considerably and slightly lower skilled | -10.3                         |                                             | 1.8                                        | -4.3  | *1. considerably and slightly lower skilled | -6.7                          | 1.3                                         |                                            | -1.4                                       | *1. thin                      | -8.3                          | 1.6                                             | -7.1                             |                |         |         |       |       |
| *2. neither                   | -6.4            | 1.3                              | 1.1   | 0.042 (1 VS 3)                              | *2. slightly highly skilled   | -5.8                                        | 1.5                                        | 0.2   | 0.042 (1 VS 3)                              | *2. slightly highly skilled   | -8.3                                        | 1.2                                        | -3.1                                       | 0.042 (1 VS 3)                | *2. maintain the present body | -7.3                                            | 1.0                              | -6.2           |         |         |       |       |
| *3. yes                       | -7.5            | 1.2                              | 0.0   |                                             | *3. considerably highly skill | -6.0                                        | 1.2                                        | 0.0   |                                             | *3. considerably highly skill | -5.2                                        | 1.4                                        | 0.0                                        |                               | *3. overweight or obese       | -1.1                                            | 2.9                              | 0.0            |         |         |       |       |
| Non-ambulatory                | 1. no           | -0.6                             | 1.7   |                                             | 1.5                           | 0.024 (1 VS 2)                              | 1. considerably and slightly lower skilled | -3.0  |                                             | 1.1                           | -0.4                                        | 0.024 (1 VS 2)                             | 1. considerably and slightly lower skilled |                               | -4.0                          | 0.9                                             | -2.4                             | 0.024 (1 VS 2) | 1. thin | -1.8    | 1.1   | 1.6   |
| 2. neither                    | -3.2            | 0.8                              | -1.1  |                                             | 2. slightly highly skilled    |                                             | -1.7                                       | 0.9   |                                             | 0.8                           | 2. slightly highly skilled                  |                                            | -1.4                                       |                               | 0.8                           | 0.2                                             | 2. maintain the present body     |                | -2.3    | 0.7     | 1.1   |       |
| 3. yes                        | -2.1            | 0.7                              | 0.0   | 3. considerably highly skill                | -2.5                          |                                             | 0.8                                        | 0.0   | 3. considerably highly skill                | -1.6                          | 1.0                                         |                                            | 0.0                                        | 3. overweight or obese        | -3.4                          | 2.1                                             | 0.0                              |                |         |         |       |       |
| *1. no                        | -0.6            | 1.7                              | 1.6   | *1. considerably and slightly lower skilled | -3.0                          |                                             | 1.1                                        | -0.5  | *1. considerably and slightly lower skilled | -3.9                          | 0.9                                         |                                            | -2.4                                       | *1. thin                      | -1.8                          | 1.1                                             | 1.4                              |                |         |         |       |       |
| *2. neither                   | -3.2            | 0.8                              | -1.1  | 0.033 (1 VS 2)                              | *2. slightly highly skilled   | -1.8                                        | 0.9                                        | 0.7   | 0.033 (1 VS 2)                              | *2. slightly highly skilled   | -1.4                                        | 0.8                                        | 0.1                                        | 0.033 (1 VS 2)                | *2. maintain the present body | -2.3                                            | 0.7                              | 0.9            |         |         |       |       |
| *3. yes                       | -2.1            | 0.7                              | 0.0   |                                             | *3. considerably highly skill | -2.5                                        | 0.8                                        | 0.0   |                                             | *3. considerably highly skill | -1.5                                        | 1.0                                        | 0.0                                        |                               | *3. overweight or obese       | -3.2                                            | 2.1                              | 0.0            |         |         |       |       |
| Total                         | 1. no           | -7.1                             | 3.7   |                                             | 2.4                           | 0.041 (1 VS 2)                              | 1. considerably and slightly lower skilled | -13.6 |                                             | 2.3                           | -5.1                                        | 0.041 (1 VS 2)                             | 1. considerably and slightly lower skilled |                               | -11.1                         | 1.7                                             | -4.7                             | 0.041 (1 VS 2) | 1. thin | -10.0   | 2.2   | -5.1  |
| 2. neither                    | -9.7            | 1.7                              | -0.1  |                                             | 2. slightly highly skilled    |                                             | -7.5                                       | 1.9   |                                             | 1.0                           | 2. slightly highly skilled                  |                                            | -9.6                                       |                               | 1.6                           | -3.2                                            | 2. maintain the present body     |                | -9.6    | 1.4     | -4.7  |       |
| 3. yes                        | -9.5            | 1.6                              | 0.0   | 3. considerably highly skill                | -8.5                          |                                             | 1.6                                        | 0.0   | 3. considerably highly skill                | -6.4                          | 1.9                                         |                                            | 0.0                                        | 3. overweight or obese        | -4.9                          | 4.1                                             | 0.0                              |                |         |         |       |       |
| *1. no                        | -6.6            | 3.7                              | 2.9   | *1. considerably and slightly lower skilled | -13.3                         |                                             | 2.3                                        | -5.1  | *1. considerably and slightly lower skilled | -10.7                         | 1.7                                         |                                            | -4.3                                       | *1. thin                      | -10.1                         | 2.2                                             | -5.9                             |                |         |         |       |       |
| *2. neither                   | -9.6            | 1.7                              | -0.1  | 0.041 (1 VS 2)                              | *2. slightly highly skilled   | -7.8                                        | 1.9                                        | 0.5   | 0.041 (1 VS 2)                              | *2. slightly highly skilled   | -9.7                                        | 1.6                                        | -3.3                                       | 0.041 (1 VS 2)                | *2. maintain the present body | -9.5                                            | 1.3                              | -5.2           |         |         |       |       |
| *3. yes                       | -9.5            | 1.6                              | 0.0   |                                             | *3. considerably highly skill | -8.3                                        | 1.6                                        | 0.0   |                                             | *3. considerably highly skill | -6.4                                        | 1.9                                        | 0.0                                        |                               | *3. overweight or obese       | -4.3                                            | 4.1                              | 0.0            |         |         |       |       |
| AMPA (min/day)                |                 |                                  |       |                                             |                               |                                             |                                            |       |                                             |                               |                                             |                                            |                                            |                               |                               |                                                 |                                  |                |         |         |       |       |
| Ambulatory                    | 1. no           | -5.6                             | 2.6   |                                             | 0.1                           | 0.025 (1 VS 2)                              | 1. considerably and slightly lower skilled | -8.9  |                                             | 1.6                           | -4.6                                        | 0.025 (1 VS 2)                             | 1. considerably and slightly lower skilled |                               | -5.4                          | 1.2                                             | -1.8                             | 0.025 (1 VS 2) | 1. thin | -6.6    | 1.5   | -6.6  |
| 2. neither                    | -4.8            | 1.2                              | 1.0   | 2. slightly highly skilled                  | -4.2                          |                                             | 1.3                                        | 0.1   | 2. slightly highly skilled                  | -6.4                          | 1.1                                         |                                            | -2.8                                       | 2. maintain the present body  | -5.6                          | 0.9                                             | -5.6                             |                |         |         |       |       |
| 3. yes                        | -5.7            | 1.2                              | 0.0   | 3. considerably highly skill                | -4.4                          |                                             | 1.1                                        | 0.0   | 3. considerably highly skill                | -3.7                          | 1.3                                         |                                            | 0.0                                        | 3. overweight or obese        | 0.0                           | 2.7                                             | 0.0                              |                |         |         |       |       |
| *1. no                        | -5.2            | 2.7                              | 0.6   | *1. considerably and slightly lower skilled | -8.8                          |                                             | 1.6                                        | -4.5  | *1. considerably and slightly lower skilled | -5.2                          | 1.2                                         |                                            | -1.4                                       | *1. thin                      | -6.7                          | 1.5                                             | -7.0                             |                |         |         |       |       |
| *2. neither                   | -4.8            | 1.2                              | 1.0   | 0.037 (1 VS 2)                              | *2. slightly highly skilled   | -4.4                                        | 1.4                                        | -0.1  | 0.037 (1 VS 2)                              | *2. slightly highly skilled   | -6.5                                        | 1.1                                        | -2.7                                       | 0.037 (1 VS 2)                | *2. maintain the present body | -5.7                                            | 0.9                              | -6.0           |         |         |       |       |
| *3. yes                       | -5.8            | 1.2                              | 0.0   |                                             | *3. considerably highly skill | -4.3                                        | 1.1                                        | 0.0   |                                             | *3. considerably highly skill | -3.8                                        | 1.3                                        | 0.0                                        |                               | *3. overweight or obese       | 0.3                                             | 2.7                              | 0.0            |         |         |       |       |
| Non-ambulatory                | 1. no           | -0.6                             | 1.7   |                                             | 1.3                           | 0.024 (1 VS 3)                              | 1. considerably and slightly lower skilled | -2.8  |                                             | 1.1                           | -0.5                                        | 0.024 (1 VS 3)                             | 1. considerably and slightly lower skilled |                               | -3.7                          | 0.8                                             | -2.5                             | 0.024 (1 VS 3) | 1. thin | -1.7    | 1.1   | 1.3   |
| 2. neither                    | -2.8            | 0.8                              | -1.0  |                                             | 2. slightly highly skilled    |                                             | -1.5                                       | 0.9   |                                             | 0.7                           | 2. slightly highly skilled                  |                                            | -1.2                                       |                               | 0.8                           | 0.1                                             | 2. maintain the present body     |                | -1.9    | 0.6     | 1.1   |       |
| 3. yes                        | -1.9            | 0.7                              | 0.0   | 3. considerably highly skill                | -2.2                          |                                             | 0.7                                        | 0.0   | 3. considerably highly skill                | -1.2                          | 0.9                                         |                                            | 0.0                                        | 3. overweight or obese        | -3.0                          | 2.0                                             | 0.0                              |                |         |         |       |       |
| *1. no                        | -0.5            | 1.7                              | 1.3   | *1. considerably and slightly lower skilled | -2.7                          |                                             | 1.1                                        | -0.5  | *1. considerably and slightly lower skilled | -3.7                          | 0.8                                         |                                            | -2.4                                       | *1. thin                      | -1.7                          | 1.1                                             | 1.2                              |                |         |         |       |       |
| *2. neither                   | -2.8            | 0.8                              | -1.0  | 0.028 (1 VS 2)                              | *2. slightly highly skilled   | -1.6                                        | 0.9                                        | 0.6   | 0.028 (1 VS 2)                              | *2. slightly highly skilled   | -1.2                                        | 0.8                                        | 0.0                                        | 0.028 (1 VS 2)                | *2. maintain the present body | -2.0                                            | 0.6                              | 0.9            |         |         |       |       |
| *3. yes                       | -1.9            | 0.7                              | 0.0   |                                             | *3. considerably highly skill | -2.2                                        | 0.7                                        | 0.0   |                                             | *3. considerably highly skill | -1.2                                        | 0.9                                        | 0.0                                        |                               | *3. overweight or obese       | -2.9                                            | 2.0                              | 0.0            |         |         |       |       |
| Total                         | 1. no           | -5.8                             | 3.4   |                                             | 1.7                           | 0.023 (1 VS 2)                              | 1. considerably and slightly lower skilled | -11.1 |                                             | 2.1                           | -4.7                                        | 0.023 (1 VS 2)                             | 1. considerably and slightly lower skilled |                               | -9.0                          | 1.6                                             | -4.2                             | 0.023 (1 VS 2) | 1. thin | -8.1    | 2.0   | -5.2  |
| 2. neither                    | -7.4            | 1.6                              | 0.2   |                                             | 2. slightly highly skilled    |                                             | -5.9                                       | 1.8   |                                             | 0.5                           | 2. slightly highly skilled                  |                                            | -7.5                                       |                               | 1.5                           | -2.8                                            | 2. maintain the present body     |                | -7.5    | 1.2     | -4.6  |       |
| 3. yes                        | -7.6            | 1.5                              | 0.0   | 3. considerably highly skill                | -6.4                          |                                             | 1.5                                        | 0.0   | 3. considerably highly skill                | -4.7                          | 1.8                                         |                                            | 0.0                                        | 3. overweight or obese        | -2.9                          | 3.7                                             | 0.0                              |                |         |         |       |       |
| *1. no                        | -5.4            | 3.4                              | 2.1   | *1. considerably and slightly lower skilled | -11.0                         |                                             | 2.1                                        | -4.8  | *1. considerably and slightly lower skilled | -8.6                          | 1.6                                         |                                            | -3.8                                       | *1. thin                      | -8.2                          | 2.0                                             | -6.0                             |                |         |         |       |       |
| *2. neither                   | -7.4            | 1.6                              | 0.2   | 0.049 (1 VS 3)                              | *2. slightly highly skilled   | -6.1                                        | 1.8                                        | 0.1   | 0.049 (1 VS 3)                              | *2. slightly highly skilled   | -7.6                                        | 1.5                                        | -2.8                                       | 0.049 (1 VS 3)                | *2. maintain the present body | -7.5                                            | 1.2                              | -5.3           |         |         |       |       |
| *3. yes                       | -7.5            | 1.5                              | 0.0   |                                             | *3. considerably highly skill | -6.2                                        | 1.5                                        | 0.0   |                                             | *3. considerably highly skill | -4.8                                        | 1.7                                        | 0.0                                        |                               | *3. overweight or obese       | -2.2                                            | 3.7                              | 0.0            |         |         |       |       |
| AStep count (steps/day)       |                 |                                  |       |                                             |                               |                                             |                                            |       |                                             |                               |                                             |                                            |                                            |                               |                               |                                                 |                                  |                |         |         |       |       |
| 1. no                         | -2021           | 668                              | -290  |                                             | 0.031 (1 VS 2)                | 1. considerably and slightly lower skilled  | -2563                                      | 415   |                                             | -1077                         | 0.031 (1 VS 2)                              | 1. considerably and slightly lower skilled | -1968                                      |                               | 325                           | -827                                            | 0.031 (1 VS 2)                   | 1. thin        | -1902   | 419     | -1027 |       |
| 2. neither                    | -1495           | 313                              | 236   | 2. slightly highly skilled                  |                               | -1352                                       | 347                                        | 135   | 2. slightly highly skilled                  | -1807                         |                                             | 306                                        | -666                                       | 2. maintain the present body  | -1682                         | 256                                             |                                  | -806           |         |         |       |       |
| 3. yes                        | -1731           | 294                              | 0     | 3. considerably highly skill                |                               | -1487                                       | 288                                        | 0     | 3. considerably highly skill                | -1141                         |                                             | 353                                        | 0                                          | 3. overweight or obese        | -875                          | 781                                             |                                  | 0              |         |         |       |       |

LPA: Light physical activity, MVPA: moderate-to-vigorous physical activity, MPA: moderate physical activity, SE: standard error, Δ
