# Supplementary material for: Seasonal changes in objectively measured sedentary behavior and physical activity in Japanese primary school children
Source: Springer Nature journal article supplement (doi:10.1186/s12889-016-3633-5), 2016-09-13
Supplement: MOESM1 [file 10696626]

Additional file Table 1a Associations between changes in sedentary behavior or physical activity and potential determinants/moderators in boys

| Dependent variables           | Do you like sports or exercise? | Boys: 1: n=24, 2: n=73 |      |       |                               | Are you good at sports or exercise?         | Boys: 1: n=10, 2: n=40, 3: n=48 |       |                               |                              | How would you describe your body shape? | Boys: 1: n=9, 2: n=72, 3: n=17 |                |                            |                           | Is your child healthy? | Boys: 1: n=54, 2: n=43 |       |       |         |
|-------------------------------|---------------------------------|------------------------|------|-------|-------------------------------|---------------------------------------------|---------------------------------|-------|-------------------------------|------------------------------|-----------------------------------------|--------------------------------|----------------|----------------------------|---------------------------|------------------------|------------------------|-------|-------|---------|
|                               |                                 | Estimated mean         | SE   | B     | P-value                       |                                             | Estimated mean                  | SE    | B                             | P-value                      |                                         | Estimated mean                 | SE             | B                          | P-value                   |                        | Estimated mean         | SE    | B     | P-value |
| ASedentary behavior (min/day) | 1. slightly dislike or like     | 9.1                    | 11.1 | -1.5  | 0.902                         | 1. considerably and slightly lower skilled  | -16.5                           | 16.4  | -27.1                         | 1. thin                      | 5.2                                     | 19.4                           | -25.5          | 1 not healthy and healthy  | -0.2                      | 7.8                    | -19.1                  | 0.073 |       |         |
|                               | 2. considerably like            | 10.6                   | 7.0  | 0.0   |                               | 2. slightly highly skilled                  | 13.5                            | 8.8   | 2.9                           | 2. maintain the present body | 3.3                                     | 7.2                            | -27.4          | 2 very healthy             | 18.9                      | 8.3                    | 0.0                    |       |       |         |
|                               | *1. slightly dislike or like    | 8.4                    | 11.1 | 0.1   | 0.996                         | 3. considerably highly skill                | 10.6                            | 8.4   | 0.0                           | 3. overweight or obese       | 30.7                                    | 16.1                           | 0.0            | *1 not healthy and healthy | -1.7                      | 7.9                    | -18.6                  | 0.080 |       |         |
|                               | *2. considerably like           | 8.3                    | 7.2  | 0.0   |                               | *1. considerably and slightly lower skilled | -12.6                           | 17.1  | -21.5                         | *1. thin                     | 2.9                                     | 19.3                           | -29.7          | *2 very healthy            | 16.9                      | 8.4                    | 0.0                    |       |       |         |
|                               |                                 |                        |      |       | *2. slightly highly skilled   | 11.7                                        | 9.1                             | 2.8   | *2. maintain the present body | 0.7                          | 7.4                                     | -32.0                          |                |                            |                           |                        |                        |       |       |         |
|                               |                                 |                        |      |       | *3. considerably highly skill | 8.9                                         | 8.7                             | 0.0   | *3. overweight or obese       | 32.6                         | 16.1                                    | 0.0                            |                |                            |                           |                        |                        |       |       |         |
| ALPA (min/day)                |                                 |                        |      |       |                               |                                             |                                 |       |                               |                              |                                         |                                |                |                            |                           |                        |                        |       |       |         |
| Ambulatory                    | 1. slightly dislike or like     | -20.9                  | 4.4  | -7.8  | 0.117                         | 1. considerably and slightly lower skilled  | -21.8                           | 6.8   | -9.2                          | 1. thin                      | -17.5                                   | 8.1                            | 1.9            | 1 not healthy and healthy  | -9.8                      | 3.1                    | 10.6                   | 0.016 |       |         |
|                               | 2. considerably like            | -13.1                  | 2.9  | 0.0   |                               | 2. slightly highly skilled                  | -13.8                           | 3.6   | -1.3                          | 2. maintain the present body | -12.6                                   | 3.0                            | 6.7            | 2 very healthy             | -20.4                     | 3.5                    | 0.0                    |       |       |         |
|                               | *1. slightly dislike or like    | -22.0                  | 4.4  | -8.8  | 0.077                         | 3. considerably highly skill                | -12.6                           | 3.7   | 0.0                           | 3. overweight or obese       | -19.4                                   | 6.7                            | 0.0            | *1 not healthy and healthy | -9.9                      | 3.2                    | 10.5                   | 0.017 |       |         |
|                               | *2. considerably like           | -13.2                  | 2.9  | 0.0   |                               | *1. considerably and slightly lower skilled | -24.7                           | 6.9   | -12.9                         | *1. thin                     | -17.7                                   | 8.1                            | 0.6            | *2 very healthy            | -20.5                     | 3.5                    | 0.0                    |       |       |         |
|                               |                                 |                        |      |       | *2. slightly highly skilled   | -14.6                                       | 3.6                             | -2.7  | *2. maintain the present body | -13.3                        | 3.1                                     | 5.1                            |                |                            |                           |                        |                        |       |       |         |
|                               |                                 |                        |      |       | *3. considerably highly skill | -11.8                                       | 3.7                             | 0.0   | *3. overweight or obese       | -18.3                        | 6.8                                     | 0.0                            |                |                            |                           |                        |                        |       |       |         |
| Non-ambulatory                | 1. slightly dislike or like     | -5.6                   | 9.1  | 15.7  | 0.123                         | 1. considerably and slightly lower skilled  | 11.3                            | 13.2  | 26.3                          | 0.017 (1 VS 2)               | 1. thin                                 | 1.7                            | 16.2           | 42.0                       | 1 not healthy and healthy | -15.7                  | 6.6                    | 4.7   | 0.600 |         |
|                               | 2. considerably like            | -21.3                  | 5.7  | 0.0   |                               | 2. slightly highly skilled                  | -30.1                           | 7.1   | -15.2                         | 2. maintain the present body | -14.9                                   | 5.8                            | 25.4           | 2 very healthy             | -20.4                     | 7.1                    | 0.0                    |       |       |         |
|                               | *1. slightly dislike or like    | -5.1                   | 9.2  | 15.8  | 0.123                         | 3. considerably highly skill                | -14.9                           | 6.8   | 0.0                           | 3. overweight or obese       | -40.3                                   | 13.5                           | 0.0            | *1 not healthy and healthy | -15.0                     | 6.8                    | 5.2                    | 0.567 |       |         |
|                               | *2. considerably like           | -20.9                  | 5.8  | 0.0   |                               | *1. considerably and slightly lower skilled | 11.4                            | 13.3  | 25.8                          | 0.023 (1 VS 2)               | *1. thin                                | 2.3                            | 16.3           | 43.0                       | *2 very healthy           | -20.2                  | 7.1                    | 0.0   |       |         |
|                               |                                 |                        |      |       | *2. slightly highly skilled   | -28.9                                       | 7.4                             | -14.4 | *2. maintain the present body | -14.2                        | 6.0                                     | 26.5                           |                |                            |                           |                        |                        |       |       |         |
|                               |                                 |                        |      |       | *3. considerably highly skill | -14.5                                       | 6.9                             | 0.0   | *3. overweight or obese       | -40.7                        | 13.5                                    | 0.0                            |                |                            |                           |                        |                        |       |       |         |
| Total                         | 1. slightly dislike or like     | -27.0                  | 10.9 | 7.9   | 0.512                         | 1. considerably and slightly lower skilled  | -10.3                           | 15.8  | 18.2                          | 1. thin                      | -15.9                                   | 18.9                           | 43.8           | 1 not healthy and healthy  | -25.7                     | 7.6                    | 15.6                   | 0.140 |       |         |
|                               | 2. considerably like            | -34.9                  | 6.9  | 0.0   |                               | 2. slightly highly skilled                  | -44.3                           | 8.5   | -15.8                         | 2. maintain the present body | -28.0                                   | 6.9                            | 31.8           | 2 very healthy             | -41.3                     | 8.3                    | 0.0                    |       |       |         |
|                               | *1. slightly dislike or like    | -27.3                  | 11.0 | 7.7   | 0.528                         | 3. considerably highly skill                | -28.5                           | 8.2   | 0.0                           | 3. overweight or obese       | -59.8                                   | 15.7                           | 0.0            | *1 not healthy and healthy | -25.7                     | 7.9                    | 15.6                   | 0.150 |       |         |
|                               | *2. considerably like           | -35.0                  | 7.0  | 0.0   |                               | *1. considerably and slightly lower skilled | -10.9                           | 16.1  | 17.6                          | *1. thin                     | -16.2                                   | 19.1                           | 43.5           | *2 very healthy            | -41.3                     | 8.4                    | 0.0                    |       |       |         |
|                               |                                 |                        |      |       | *2. slightly highly skilled   | -44.5                                       | 8.6                             | -16.1 | *2. maintain the present body | -28.2                        | 7.0                                     | 31.5                           |                |                            |                           |                        |                        |       |       |         |
|                               |                                 |                        |      |       | *3. considerably highly skill | -28.5                                       | 8.3                             | 0.0   | *3. overweight or obese       | -59.6                        | 15.8                                    | 0.0                            |                |                            |                           |                        |                        |       |       |         |
| AMVPA (min/day)               |                                 |                        |      |       |                               |                                             |                                 |       |                               |                              |                                         |                                |                |                            |                           |                        |                        |       |       |         |
| Ambulatory                    | 1. slightly dislike or like     | -14.4                  | 3.0  | -8.4  | 0.014                         | 1. considerably and slightly lower skilled  | -11.1                           | 4.8   | -3.8                          | 1. thin                      | -17.2                                   | 5.7                            | -11.3          | 1 not healthy and healthy  | -5.7                      | 2.2                    | 4.7                    | 0.118 |       |         |
|                               | 2. considerably like            | -6.0                   | 1.9  | 0.0   |                               | 2. slightly highly skilled                  | -7.3                            | 2.6   | 0.1                           | 2. maintain the present body | -7.3                                    | 2.1                            | -1.4           | 2 very healthy             | -10.5                     | 2.4                    | 0.0                    |       |       |         |
|                               | *1. slightly dislike or like    | -15.5                  | 3.0  | -9.2  | 0.006                         | 3. considerably highly skill                | -7.4                            | 2.5   | 0.0                           | 3. overweight or obese       | -5.8                                    | 4.7                            | 0.0            | *1 not healthy and healthy | -6.2                      | 2.2                    | 4.5                    | 0.136 |       |         |
|                               | *2. considerably like           | -6.3                   | 1.9  | 0.0   |                               | *1. considerably and slightly lower skilled | -13.6                           | 4.9   | -6.4                          | *1. thin                     | -17.0                                   | 5.6                            | -11.6          | *2 very healthy            | -10.7                     | 2.4                    | 0.0                    |       |       |         |
|                               |                                 |                        |      |       | *2. slightly highly skilled   | -7.5                                        | 2.6                             | -0.3  | *2. maintain the present body | -7.8                         | 2.1                                     | -2.5                           |                |                            |                           |                        |                        |       |       |         |
|                               |                                 |                        |      |       | *3. considerably highly skill | -7.2                                        | 2.5                             | 0.0   | *3. overweight or obese       | -5.3                         | 4.7                                     | 0.0                            |                |                            |                           |                        |                        |       |       |         |
| Non-ambulatory                | 1. slightly dislike or like     | -0.4                   | 1.5  | -1.1  | 0.511                         | 1. considerably and slightly lower skilled  | -1.1                            | 2.2   | -2.8                          | 1. thin                      | 2.5                                     | 2.6                            | 7.7            | 1 not healthy and healthy  | 0.0                       | 1.1                    | -1.0                   | 0.480 |       |         |
|                               | 2. considerably like            | 0.7                    | 1.0  | 0.0   |                               | 2. slightly highly skilled                  | -0.4                            | 1.2   | -2.1                          | 2. maintain the present body | 1.8                                     | 1.0                            | 7.0            | 0.014 (2 VS 3)             | 2 very healthy            | 1.1                    | 1.2                    | 0.0   |       |         |
|                               | *1. slightly dislike or like    | -0.4                   | 1.5  | -1.1  | 0.526                         | 3. considerably highly skill                | 1.7                             | 1.2   | 0.0                           | 3. overweight or obese       | -5.2                                    | 2.1                            | 0.0            | *1 not healthy and healthy | 0.0                       | 1.1                    | -1.0                   | 0.483 |       |         |
|                               | *2. considerably like           | 0.6                    | 1.0  | 0.0   |                               | *1. considerably and slightly lower skilled | -1.5                            | 2.2   | -3.1                          | *1. thin                     | 2.5                                     | 2.6                            | 7.5            | *2 very healthy            | 1.0                       | 1.2                    | 0.0                    |       |       |         |
|                               |                                 |                        |      |       | *2. slightly highly skilled   | -0.4                                        | 1.2                             | -2.0  | *2. maintain the present body | 1.7                          | 1.0                                     | 6.7                            | 0.021 (2 VS 3) |                            |                           |                        |                        |       |       |         |
|                               |                                 |                        |      |       | *3. considerably highly skill | 1.7                                         | 1.2                             | 0.0   | *3. overweight or obese       | -5.0                         | 2.2                                     | 0.0                            |                |                            |                           |                        |                        |       |       |         |
| Total                         | 1. slightly dislike or like     | -14.9                  | 3.7  | -9.4  | 0.025                         | 1. considerably and slightly lower skilled  | -12.1                           | 5.8   | -6.3                          | 1. thin                      | -14.5                                   | 7.0                            | -3.5           | 1 not healthy and healthy  | -5.7                      | 2.8                    | 3.8                    | 0.314 |       |         |
|                               | 2. considerably like            | -5.5                   | 2.4  | 0.0   |                               | 2. slightly highly skilled                  | -7.5                            | 3.2   | -1.7                          | 2. maintain the present body | -5.4                                    | 2.7                            | 5.6            | 2 very healthy             | -9.5                      | 3.0                    | 0.0                    |       |       |         |
|                               | *1. slightly dislike or like    | -15.7                  | 3.7  | -10.3 | 0.013                         | 3. considerably highly skill                | -5.8                            | 3.1   | 0.0                           | 3. overweight or obese       | -11.0                                   | 5.8                            | 0.0            | *1 not healthy and healthy | -6.0                      | 2.8                    | 3.5                    | 0.347 |       |         |
|                               | *2. considerably like           | -5.4                   | 2.4  | 0.0   |                               | *1. considerably and slightly lower skilled | -15.8                           | 5.9   | -10.5                         | *1. thin                     | -14.2                                   | 6.9                            | -3.6           | *2 very healthy            | -9.5                      | 3.0                    | 0.0                    |       |       |         |
|                               |                                 |                        |      |       | *2. slightly highly skilled   | -7.2                                        | 3.2                             | -2.0  | *2. maintain the present body | -5.8                         | 2.6                                     | 4.8                            |                |                            |                           |                        |                        |       |       |         |
|                               |                                 |                        |      |       | *3. considerably highly skill | -5.3                                        | 3.0                             | 0.0   | *3. overweight or obese       | -10.6                        | 5.8                                     | 0.0                            |                |                            |                           |                        |                        |       |       |         |
| AMPA (min/day)                |                                 |                        |      |       |                               |                                             |                                 |       |                               |                              |                                         |                                |                |                            |                           |                        |                        |       |       |         |
| Ambulatory                    | 1. slightly dislike or like     | -11.2                  | 2.7  | -0.6  | 0.023                         | 1. considerably and slightly lower skilled  | -8.6                            | 4.2   | -3.2                          | 1. thin                      | -14.2                                   | 5.0                            | -10.6          | 1 not healthy and healthy  | -3.9                      | 2.0                    | 4.2                    | 0.119 |       |         |
|                               | 2. considerably like            | -4.3                   | 1.7  | 0.0   |                               | 2. slightly highly skilled                  | -5.1                            | 2.3   | 0.3                           | 2. maintain the present body | -5.3                                    | 1.9                            | -1.7           | 2 very healthy             | -8.1                      | 2.1                    | 0.0                    |       |       |         |
|                               | *1. slightly dislike or like    | -12.0                  | 2.6  | -7.6  | 0.012                         | 3. considerably highly skill                | -5.4                            | 2.2   | 0.0                           | 3. overweight or obese       | -3.6                                    | 4.2                            | 0.0            | *1 not healthy and healthy | -4.2                      | 2.0                    | 4.0                    | 0.138 |       |         |
|                               | *2. considerably like           | -4.4                   | 1.7  | 0.0   |                               | *1. considerably and slightly lower skilled | -10.5                           | 4.4   | -5.3                          | *1. thin                     | -14.0                                   | 5.0                            | -10.7          | *2 very healthy            | -8.2                      | 2.1                    | 0.0                    |       |       |         |
|                               |                                 |                        |      |       | *2. slightly highly skilled   | -5.3                                        | 2.3                             | -0.1  | *2. maintain the present body | -5.7                         | 1.9                                     | -2.4                           |                |                            |                           |                        |                        |       |       |         |
|                               |                                 |                        |      |       | *3. considerably highly skill | -5.3                                        | 2.2                             | 0.0   | *3. overweight or obese       | -3.3                         | 4.1                                     | 0.0                            |                |                            |                           |                        |                        |       |       |         |
| Non-ambulatory                | 1. slightly dislike or like     | 0.5                    | 1.5  | 0.6   | 0.696                         | 1. considerably and slightly lower skilled  | -0.5                            | 2.2   | -2.5                          | 1. thin                      | 2.9                                     | 2.5                            | 7.8            | 1 not healthy and healthy  | 0.6                       | 1.1                    | -0.9                   | 0.522 |       |         |
|                               | 2. considerably like            | 1.1                    | 0.9  | 0.0   |                               | 2. slightly highly skilled                  | 0.2                             | 1.2   | -1.8                          | 2. maintain the present body | 2.3                                     | 0.9                            | 7.3            | 0.008 (2 VS 3)             | 2 very healthy            | 1.5                    | 1.1                    | 0.0   |       |         |
|                               | *1. slightly dislike or like    | 0.5                    | 1.5  | -0.6  | 0.715                         | 3. considerably highly skill                | 2.0                             | 1.1   | 0.0                           | 3. overweight or obese       | -4.9                                    | 2.1                            | 0.0            | *1 not healthy and healthy | 0.5                       | 1.1                    | -0.9                   | 0.517 |       |         |
|                               | *2. considerably like           | 1.1                    | 0.9  | 0.0   |                               | *1. considerably and slightly lower skilled | -0.7                            | 2.2   | -2.7                          | *1. thin                     | 2.9                                     | 2.5                            | 7.8            | *2 very healthy            | 1.5                       | 1.1                    | 0.0                    |       |       |         |
|                               |                                 |                        |      |       | *2. slightly highly skilled   | 0.2                                         | 1.2                             | -1.7  | *2. maintain the present body | 2.3                          | 0.9                                     | 7.2                            | 0.010 (2 VS 3) |                            |                           |                        |                        |       |       |         |
|                               |                                 |                        |      |       | *3. considerably highly skill | 2.0                                         | 1.1                             | 0.0   | *3. overweight or obese       | -4.9                         | 2.1                                     | 0.0                            |                |                            |                           |                        |                        |       |       |         |
| Total                         | 1. slightly dislike or like     | -10.9                  | 3.4  | -7.3  | 0.051                         | 1. considerably and slightly lower skilled  | -8.8                            | 5.1   | -5.2                          | 1. thin                      | -11.4                                   | 6.2                            | -2.5           | 1 not healthy and healthy  | -3.6                      | 2.5                    | 3.3                    | 0.327 |       |         |
|                               | 2. considerably like            | -3.6                   | 2.2  | 0.0   |                               | 2. slightly highly skilled                  | -5.1                            | 2.9   | -1.5                          | 2. maintain the present body | -3.1                                    | 2.3                            | 5.9            | 2 very healthy             | -6.8                      | 2.7                    | 0.0                    |       |       |         |
|                               | *1. slightly dislike or like    | -11.4                  | 3.3  | -7.9  | 0.033                         | 3. considerably highly skill                | -3.6                            | 2.7   | 0.0                           | 3. overweight or obese       | -8.9                                    | 5.1                            | 0.0            | *1 not healthy and healthy | -4.1                      | 2.5                    | 3.6                    | 0.291 |       |         |
|                               | *2. considerably like           | -3.5                   | 2.1  | 0.0   |                               | *1. considerably and slightly lower skilled | -11.8                           | 5.3   | -8.6                          | *1. thin                     | -11.0                                   | 6.1                            | -2.4           | *2 very healthy            | -7.7                      | 2.7                    | 0.0                    |       |       |         |
|                               |                                 |                        |      |       | *2. slightly highly skilled   | -4.8                                        | 2.8                             | -1.6  | *2. maintain the present body | -3.3                         | 2.3                                     | 5.3                            |                |                            |                           |                        |                        |       |       |         |
|                               |                                 |                        |      |       | *3. considerably highly skill | -3.2                                        | 2.7                             | 0.0   | *3. overweight or obese       | -8.6                         | 5.1                                     | 0.0                            |                |                            |                           |                        |                        |       |       |         |
| AStep count (steps/day)       |                                 |                        |      |       |                               |                                             |                                 |       |                               |                              |                                         |                                |                |                            |                           |                        |                        |       |       |         |
|                               | 1. slightly dislike or like     | -2883                  | 601  | -1399 | 0.042                         | 1. considerably and slightly lower skilled  | -2664                           | 953   | -1089                         | 1. thin                      | -2461                                   | 1143                           | -349           | 1 not healthy and healthy  | -1201                     | 440                    | 1322                   | 0.030 |       |         |
|                               | 2. considerably like            | -1483                  | 397  | 0     |                               | 2. slightly highly skilled                  | -1661                           | 513   | -86                           | 2. maintain the present body | -1592                                   | 425                            | 521            | 2 very healthy             | -2523                     | 487                    | 0                      |       |       |         |
|                               |                                 |                        |      |       |                               | 3. considerably highly skill                | -1576                           | 515   | 0                             | 3. overweight or obese       | -2113                                   | 946                            | 0              |                            |                           |                        |                        |       |       |         |

LPA: Light physical activity, MVPA: moderate-to-vigorous physical activity, MPA: moderate physical activity, SE: standard error, A: change, A variables were calculated as follow-up values minus baseline values, adjusted for school, follow-up periods, age and sedentary behavior or physical activity at baseline, \*: adjusted for school, follow-up periods, age and sedentary behavior or moderate-to-vigorous physical activity at baseline.
